# Supplementary material for: Material Extrusion Filament Width and Height Prediction via Design of Experiment and Machine Learning
Source: MDPI journal article supplement (doi:10.3390/mi14112091), 2023-11-12
Supplement: s1 [file s1]

---

## Supplementary Material

# Material Extrusion Filament Width and Height Prediction via Design of Experiment and Machine Learning

Xiaoquan Shi <sup>1</sup>, Yazhou Sun <sup>1,\*</sup>, Haiying Tian <sup>1</sup>, Puthanveetil Madathil Abhilash <sup>2</sup>,  
Xichun Luo <sup>2</sup> and Haitao Liu <sup>1,\*</sup>

<sup>1</sup> Department of Mechanical Engineering and Automation, Harbin Institute of Technology, Harbin 150001, China;  
xiaoquanhit@163.com (X.S.); thy0567@163.com (H.T.)

<sup>2</sup> Centre for Precision Manufacturing, Department of Design, Manufacturing & Engineering Management,  
University of Strathclyde, Glasgow G1 1XJ, UK; abhilash.p-m@strath.ac.uk (P.M.A.); xichun.luo@strath.ac.uk (X.L.)

\* Correspondence: sunyzh@hit.edu.cn (Y.S.); hthit@hit.edu.cn (H.L.)

Table S1. List of the process parameters and respective sample numbers as the supplement of the DoE.

| Number | Nozzle diameter<br>(mm) | Nondimensional nozzle<br>height | Extrusion pressure<br>(kPa) | Printing speed<br>(mm/s) |
|--------|-------------------------|---------------------------------|-----------------------------|--------------------------|
| 1      | 0.33                    | 0.8                             | 350                         | 5.0                      |
| 2      | 0.33                    | 0.8                             | 425                         | 2.5                      |
| 3      | 0.33                    | 0.8                             | 500                         | 7.5                      |
| 4      | 0.33                    | 1.0                             | 350                         | 2.5                      |
| 5      | 0.33                    | 1.0                             | 425                         | 7.5                      |
| 6      | 0.33                    | 1.0                             | 500                         | 5.0                      |
| 7      | 0.33                    | 1.2                             | 350                         | 7.5                      |
| 8      | 0.33                    | 1.2                             | 425                         | 5.0                      |
| 9      | 0.33                    | 1.2                             | 500                         | 2.5                      |
| 10     | 0.41                    | 0.8                             | 350                         | 7.5                      |
| 11     | 0.41                    | 0.8                             | 425                         | 5.0                      |
| 12     | 0.41                    | 0.8                             | 500                         | 2.5                      |
| 13     | 0.41                    | 1.0                             | 350                         | 5.0                      |
| 14     | 0.41                    | 1.0                             | 425                         | 2.5                      |
| 15     | 0.41                    | 1.0                             | 500                         | 7.5                      |
| 16     | 0.41                    | 1.2                             | 350                         | 2.5                      |
| 17     | 0.41                    | 1.2                             | 425                         | 7.5                      |
| 18     | 0.41                    | 1.2                             | 500                         | 5.0                      |
| 19     | 0.51                    | 0.8                             | 350                         | 2.5                      |
| 20     | 0.51                    | 0.8                             | 425                         | 7.5                      |
| 21     | 0.51                    | 0.8                             | 500                         | 5.0                      |
| 22     | 0.51                    | 1.0                             | 350                         | 7.5                      |
| 23     | 0.51                    | 1.0                             | 425                         | 5.0                      |
| 24     | 0.51                    | 1.0                             | 500                         | 2.5                      |
| 25     | 0.51                    | 1.2                             | 350                         | 5.0                      |
| 26     | 0.51                    | 1.2                             | 425                         | 2.5                      |
| 27     | 0.51                    | 1.2                             | 500                         | 7.5                      |
| 28     | 0.51                    | 1.2                             | 350                         | 7.5                      |
| 29     | 0.41                    | 1.0                             | 425                         | 7.5                      |
| 30     | 0.33                    | 1.1                             | 350                         | 2.5                      |
| 31     | 0.51                    | 1.2                             | 500                         | 5.0                      |
| 32     | 0.33                    | 0.8                             | 390                         | 6.3                      |
| 33     | 0.51                    | 1.0                             | 500                         | 6.3                      |
| 34     | 0.41                    | 1.0                             | 350                         | 7.5                      |
| 35     | 0.41                    | 0.8                             | 390                         | 3.8                      |
| 36     | 0.41                    | 1.1                             | 390                         | 6.3                      |
| 37     | 0.33                    | 1.0                             | 425                         | 5.0                      |
| 38     | 0.41                    | 1.1                             | 390                         | 7.5                      |
| 39     | 0.33                    | 0.8                             | 460                         | 6.3                      |
| 40     | 0.51                    | 1.2                             | 460                         | 2.5                      |
| 41     | 0.33                    | 1.0                             | 460                         | 2.5                      |
| 42     | 0.41                    | 1.0                             | 350                         | 6.3                      |
| 43     | 0.41                    | 0.8                             | 460                         | 7.5                      |
| 44     | 0.33                    | 0.9                             | 460                         | 6.3                      |
| 45     | 0.41                    | 1.2                             | 390                         | 7.5                      |
| 46     | 0.51                    | 1.1                             | 350                         | 7.5                      |
| 47     | 0.41                    | 0.9                             | 460                         | 5.0                      |

|    |      |     |     |     |
|----|------|-----|-----|-----|
| 48 | 0.33 | 0.8 | 390 | 7.5 |
| 49 | 0.33 | 1.0 | 390 | 2.5 |
| 50 | 0.51 | 0.9 | 425 | 7.5 |
| 51 | 0.41 | 1.0 | 460 | 7.5 |
| 52 | 0.41 | 0.8 | 425 | 3.8 |
| 53 | 0.33 | 1.2 | 350 | 6.3 |
| 54 | 0.51 | 1.1 | 390 | 2.5 |
| 55 | 0.33 | 1.1 | 350 | 3.8 |
| 56 | 0.41 | 0.9 | 350 | 5.0 |
| 57 | 0.41 | 1.2 | 350 | 7.5 |
| 58 | 0.33 | 1.1 | 390 | 6.3 |
| 59 | 0.51 | 0.9 | 460 | 6.3 |
| 60 | 0.33 | 0.8 | 500 | 2.5 |
| 61 | 0.41 | 1.1 | 425 | 3.8 |
| 62 | 0.33 | 0.9 | 460 | 2.5 |
| 63 | 0.33 | 0.8 | 500 | 3.8 |
| 64 | 0.33 | 1.1 | 390 | 5.0 |
| 65 | 0.51 | 0.9 | 390 | 5.0 |
| 66 | 0.51 | 0.9 | 350 | 2.5 |
| 67 | 0.41 | 1.1 | 460 | 6.3 |
| 68 | 0.51 | 0.8 | 390 | 5.0 |
| 69 | 0.41 | 0.9 | 425 | 3.8 |
| 70 | 0.33 | 0.9 | 500 | 7.5 |

Table S2. List of the average filament width and height for each 3D-printed sample.

| Sample number | Average filament width (mm) | Average filament height (mm) | Sample number | Average filament width (mm) | Average filament height (mm) |
|---------------|-----------------------------|------------------------------|---------------|-----------------------------|------------------------------|
| 1             | 0.7707                      | 0.2213                       | 36            | 0.5764                      | 0.2396                       |
| 2             | 1.1711                      | 0.3738                       | 37            | 0.5283                      | 0.2089                       |
| 3             | 0.7516                      | 0.2422                       | 38            | 0.5092                      | 0.2211                       |
| 4             | 0.9639                      | 0.3377                       | 39            | 0.5246                      | 0.1984                       |
| 5             | 0.6808                      | 0.2108                       | 40            | 1.8159                      | 0.6829                       |
| 6             | 0.9204                      | 0.2840                       | 41            | 0.6810                      | 0.3152                       |
| 7             | 0.5945                      | 0.1830                       | 42            | 0.5844                      | 0.2024                       |
| 8             | 0.7960                      | 0.2677                       | 43            | 0.6472                      | 0.2458                       |
| 9             | 1.2216                      | 0.4180                       | 44            | 0.5996                      | 0.1699                       |
| 10            | 0.7436                      | 0.2168                       | 45            | 0.4592                      | 0.2259                       |
| 11            | 1.0404                      | 0.3058                       | 46            | 1.2597                      | 0.3886                       |
| 12            | 1.4925                      | 0.5144                       | 47            | 0.7382                      | 0.3203                       |
| 13            | 0.8851                      | 0.2915                       | 48            | 0.4076                      | 0.1601                       |
| 14            | 1.3689                      | 0.4618                       | 49            | 0.6705                      | 0.2871                       |
| 15            | 0.8757                      | 0.2853                       | 50            | 1.0856                      | 0.3833                       |
| 16            | 1.1449                      | 0.3937                       | 51            | 0.5768                      | 0.2563                       |
| 17            | 0.7895                      | 0.2470                       | 52            | 0.8777                      | 0.3138                       |
| 18            | 1.0179                      | 0.3590                       | 53            | 0.3749                      | 0.1496                       |
| 19            | 1.8093                      | 0.6532                       | 54            | 1.7067                      | 0.6046                       |
| 20            | 1.2293                      | 0.4150                       | 55            | 0.4616                      | 0.2113                       |
| 21            | 1.6512                      | 0.5850                       | 56            | 0.6176                      | 0.2513                       |
| 22            | 1.0604                      | 0.3794                       | 57            | 0.4296                      | 0.2026                       |
| 23            | 1.5081                      | 0.5194                       | 58            | 0.3924                      | 0.1770                       |
| 24            | 2.2892                      | 0.8541                       | 59            | 1.2078                      | 0.4594                       |

|    |        |        |    |        |        |
|----|--------|--------|----|--------|--------|
| 25 | 1.2661 | 0.4575 | 60 | 0.8531 | 0.3331 |
| 26 | 2.0145 | 0.7283 | 61 | 0.8744 | 0.2922 |
| 27 | 1.2939 | 0.4697 | 62 | 0.8166 | 0.3065 |
| 28 | 0.8661 | 0.3436 | 63 | 0.7337 | 0.2526 |
| 29 | 0.6116 | 0.2227 | 64 | 0.4737 | 0.1830 |
| 30 | 0.6249 | 0.2424 | 65 | 1.1634 | 0.4704 |
| 31 | 1.3484 | 0.5461 | 66 | 1.5834 | 0.5964 |
| 32 | 0.4580 | 0.1703 | 67 | 0.6062 | 0.2691 |
| 33 | 1.2851 | 0.4937 | 68 | 1.2472 | 0.4542 |
| 34 | 0.5186 | 0.2178 | 69 | 0.8541 | 0.3195 |
| 35 | 0.9002 | 0.2845 | 70 | 0.5190 | 0.1801 |

Table S3. The printed filament width and height range of different parameter combinations.

| Nozzle diameter (mm) | Nondimensional nozzle height | Extrusion pressure (kPa) | Printing speed (mm/s) | Filament width (mm) | Filament height (mm) |
|----------------------|------------------------------|--------------------------|-----------------------|---------------------|----------------------|
| 0.35 - 0.50          | 1.1                          | 420                      | 2.5 - 7.5             | 0.4747 - 1.7936     | 0.2026 - 0.6610      |
| 0.35 - 0.50          | 1.1                          | 350 - 450                | 5                     | 0.4798 - 1.3575     | 0.1901 - 0.5660      |
| 0.35 - 0.50          | 0.8 - 1.2                    | 420                      | 5                     | 0.4051 - 1.3732     | 0.2048 - 0.4995      |
| 0.42                 | 0.8 - 1.2                    | 420                      | 2.5 - 7.5             | 0.5311 - 1.4478     | 0.2382 - 0.4675      |
| 0.42                 | 0.8 - 1.2                    | 350 - 450                | 5                     | 0.6633 - 1.2162     | 0.2605 - 0.3948      |
| 0.42                 | 1.1                          | 350 - 450                | 2.5 - 7.5             | 0.5368 - 1.4272     | 0.2217 - 0.5371      |

Equations (S1) and (S2):

$$W=5.18-7.69\times A-2.63\times B-0.01117\times C-0.014\times D+17.01\times A^2+1.08\times B^2+0.000012\times C^2+0.02207\times D^2-1.37\times A\times B+0.00352\times A\times C-0.481\times A\times D+0.00259\times B\times C-0.0288\times B\times D-0.000207\times C\times D \quad (S1)$$

$$H=1.460-3.554\times A-0.108\times B-0.00339\times C-0.0089\times D+6.407\times A^2+0.011\times B^2+0.000003\times C^2+0.00795\times D^2-0.408\times A\times B+0.00256\times A\times C-0.1788\times A\times D+0.000621\times B\times C-0.0006\times B\times D-0.000088\times C\times D \quad (S2)$$
